# Supplementary material for: Colorimetric switchable linker-based bioassay for ultrasensitive detection of prostate-specific antigen as a cancer biomarker
Source: Royal Society of Chemistry journal article supplement (doi:10.1039/c9an00552h), 2019-01-01
Supplement: c9an00552h1.pdf [file c9an00552h1.pdf]

## **Colorimetric switchable linker-based bioassay for ultrasensitive detection of prostate-specific antigen as a cancer biomarker**

Jungwoo Hahn <sup>a†</sup>, Eunghee Kim<sup>a†</sup>, Youngsang You<sup>d</sup>, Young Jin Choi<sup>a,b,c\*</sup>

<sup>a</sup>Department of Agricultural Biotechnology, <sup>b</sup>Center for Food and Bioconvergence, and <sup>c</sup>Research Institute of Agriculture and Life Sciences, Seoul National University, 1 Gwanakro, Gwanakgu, Seoul 151-921, Korea

<sup>d</sup>Department of Human Nutrition, Food and Animal Sciences University of Hawaii at Manoa Honolulu, HI 96822-2321, USA

\*Corresponding authors

Young Jin Choi

[choiyj@snu.ac.kr](mailto:choiyj@snu.ac.kr)

[+82 2 880 4851](tel:+8228804851)

<sup>†</sup>These authors contributed equally to the work.

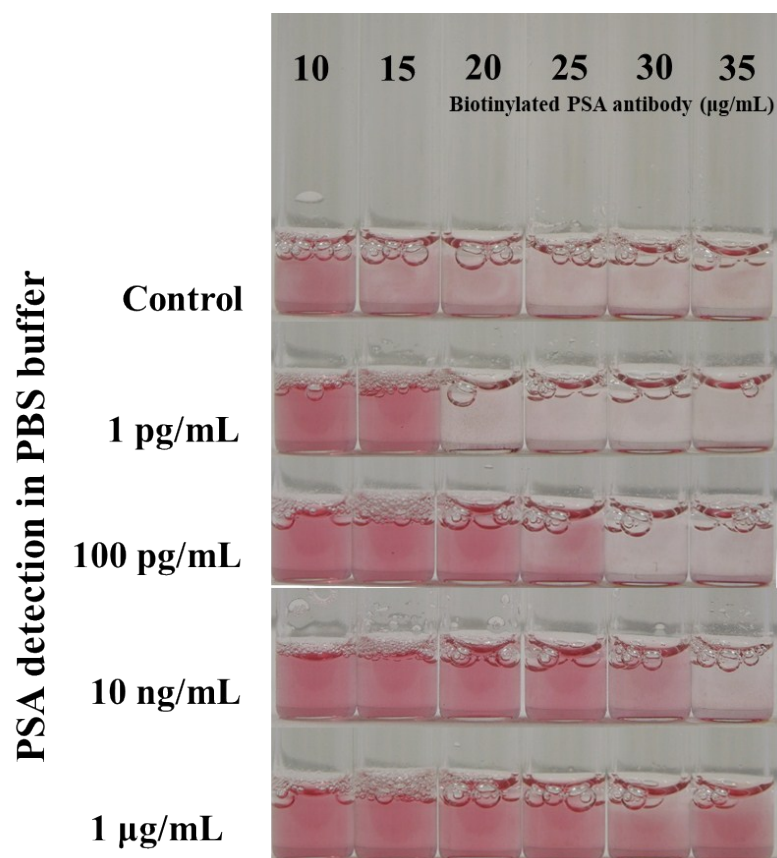

Fig. S1 REVC shifts to higher linker concentrations with the increase in PSA concentrations (from 1 pg/mL to 1 µg/mL) by 100-fold to confirm the broad detection range of the SL-based immunoassay in PBS buffer.

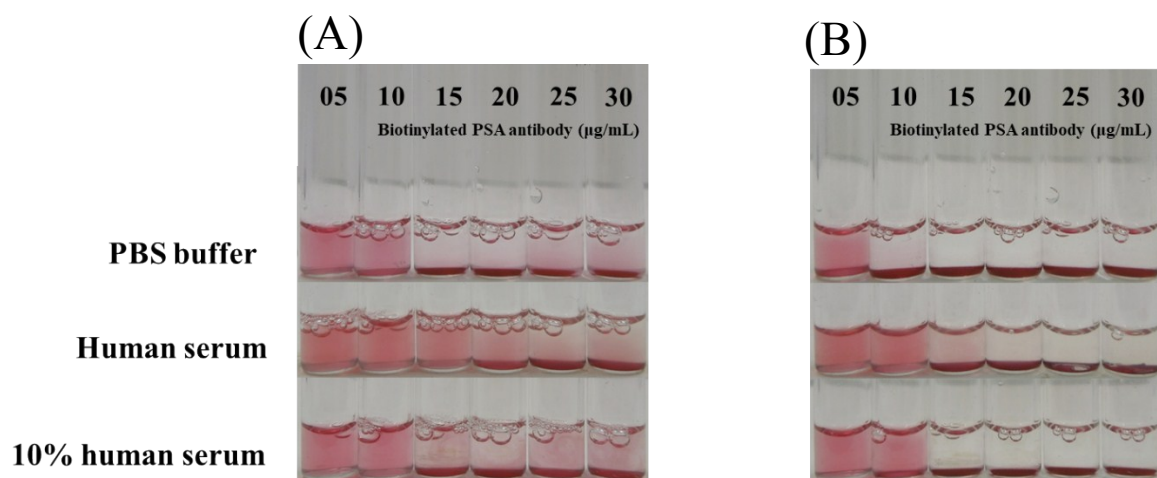

Fig. S2 The REVC difference in 3 control samples (PBS buffer, Human serum, and 10% human serum) after (A) 2 h and (B) overnight.

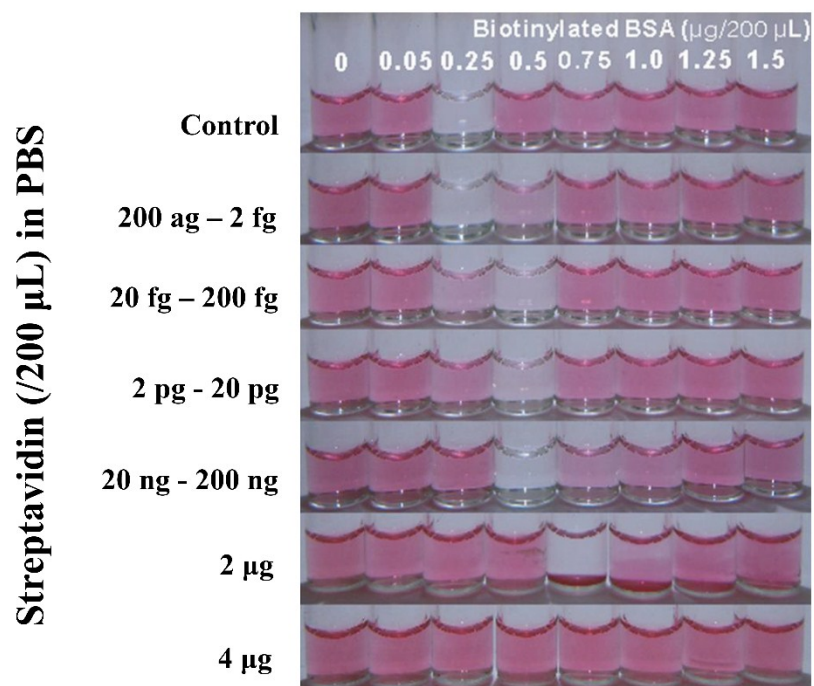

Fig. S3 Shift in REVC after 3 h of the SL-based assay for detecting streptavidin (from 200 ag/200  $\mu\text{L}$  to 4  $\mu\text{g}/200 \mu\text{L}$ ) in PBS buffer using a fixed concentration of stAuNPs (absorption :0.21 at 531.5 nm for 1/10 dilution sample).

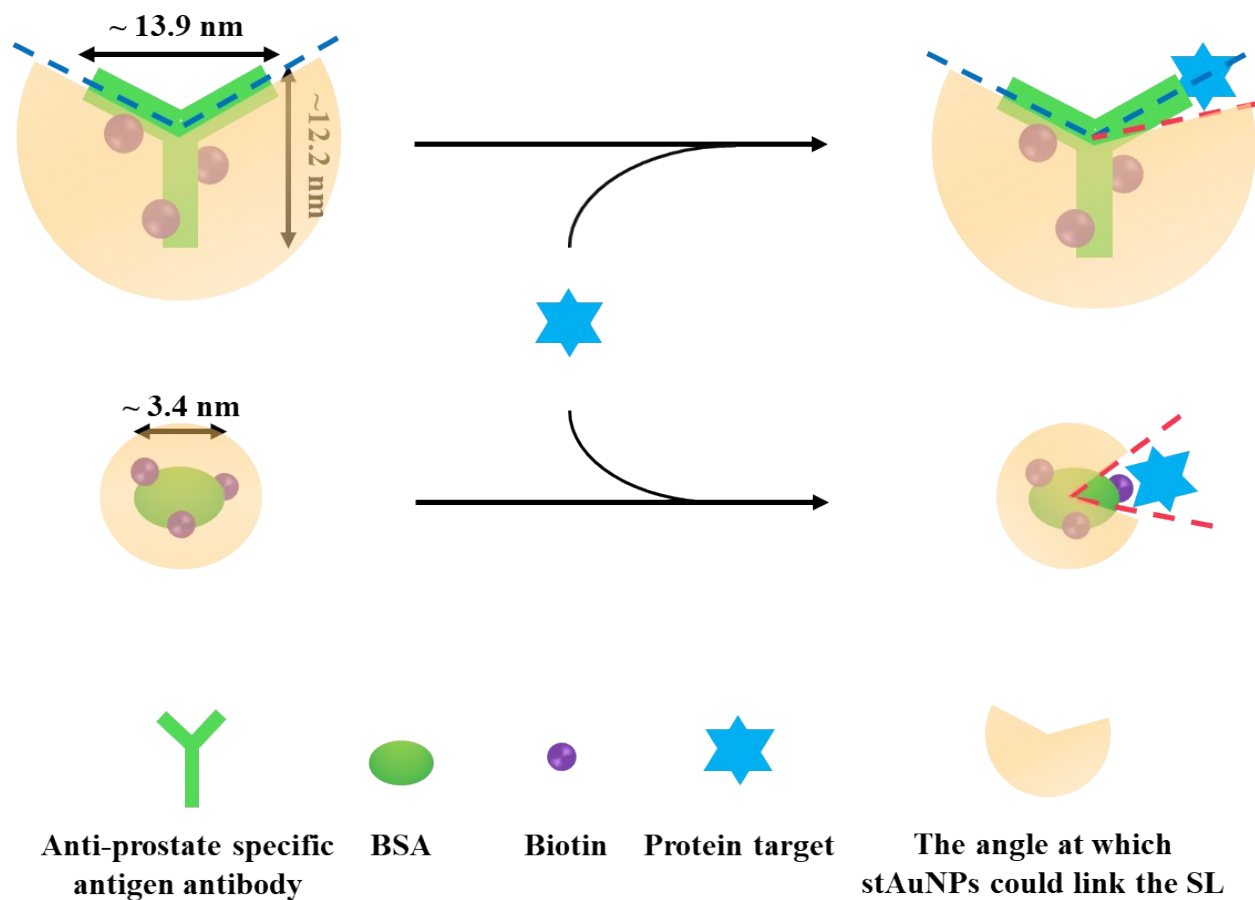

Fig. S4 Schematic representation of the physical difference between the switching off process in b-Ab and b-BSA. B-Ab has a determined target recognition site, whereas b-BSA has a target recognition site determined at random. Therefore, b-BSA is less affected by steric hindrance than b-Ab when bound to the stAuNPs in the switching-off situation.
